# Supplementary material for: Acute and long-term immune responses to SARS-CoV-2 infection in unvaccinated children and young adults with inborn errors of immunity
Source: PubMed Central journal article supplement (PMC9896004; doi:10.3389/fimmu.2023.1084630), 2023-01-20
Supplement: Table_1.pdf [file Table_1.pdf]

**Supplementary table 1.** Patients with IEI baseline clinical characteristics and SARS-CoV-2 infection description.

| Patient | Gender | Age (years) | IEI <sup>a</sup>                        | COVID-19 risk factors               | Baseline treatment |                             |                          | COVID-19 |                                                              |                                |                                   | Publication                                                            |
|---------|--------|-------------|-----------------------------------------|-------------------------------------|--------------------|-----------------------------|--------------------------|----------|--------------------------------------------------------------|--------------------------------|-----------------------------------|------------------------------------------------------------------------|
|         |        |             |                                         |                                     | IgRT               | Antibiotic                  | Immunosuppressant        | Severity | Symptoms                                                     | Treatment                      | Outcome                           |                                                                        |
| P1      | M      | 9           | MHCII def. ( <i>RFXANK</i> )            | No                                  | Yes                | Cotrimoxazole, posaconazole | Systemic corticosteroids | Moderate | Fever, non-hypoxemic pneumonia                               | Remdesivir, empiric antibiotic | Recovered                         | No                                                                     |
| P2      | M      | 9           | MHCII def. ( <i>RFXANK</i> )            | No                                  | Yes                | Cotrimoxazole, posaconazole | Systemic corticosteroids | Mild     | Asymptomatic                                                 | Remdesivir                     | Recovered                         | No                                                                     |
| P3      | F      | 17          | CD4 <sup>+</sup> idiopathic lymphopenia | No                                  | No                 | No                          | No                       | Mild     | Low-grade fever, myalgia, asthenia, smell and taste loss     | No                             | Dysgeusia, dysosmia (for 2 years) | No                                                                     |
| P4      | F      | 12          | PGM3 def.                               | No                                  | No                 | No                          | Dupilumab                | Moderate | Cough, low-grade fever<br>Ground-glass opacity on chest scan | No                             | Recovered                         | Deyà-Martínez <i>et al.</i> , 2021; García-García <i>et al.</i> , 2021 |
| P5      | M      | 19          | A-T ( <i>ATM</i> )                      | No                                  | Yes                | No                          | No                       | Mild     | Fever<br>No pneumonia (chest X-ray)                          | Empiric antibiotic             | Recovered                         | Deyà-Martínez <i>et al.</i> , 2021                                     |
| P6      | F      | 13          | Jacobsen sd (11q del.)                  | No                                  | No                 | No                          | No                       | Mild     | Cough                                                        | No                             | Recovered                         |                                                                        |
| P7      | M      | 17          | CATCH22 (22q11del.)                     | No                                  | No                 | No                          | No                       | Mild     | Asymptomatic                                                 | No                             | Recovered                         |                                                                        |
| P8      | F      | 16          | Down sd. (47,XX+21)                     | Down syndrome, mitral regurgitation | No                 | No                          | No                       | Mild     | Asymptomatic                                                 | No                             | Recovered                         |                                                                        |
| P9      | M      | 10          | Jacobsen sd. (11q del.)                 | No                                  | No                 | No                          | No                       | Mild     | Asymptomatic                                                 | No                             | Recovered                         |                                                                        |
| P10     | M      | 5           | CATCH22 (22q11 del.)                    | Cyanotic congenital heart disease   | No                 | No                          | No                       | Mild     | Fever                                                        | No                             | Recovered                         |                                                                        |
| P11     | M      | 10          | CATCH22 (22q11del.)                     | No                                  | No                 | No                          | No                       | Mild     | Asymptomatic                                                 | No                             | Recovered                         | No                                                                     |

**COVID-19 immune responses in pediatric IEI**

| Patient | Gender | Age (years) | IEI <sup>a</sup> |     | COVID-19 risk factors | Baseline treatment |                             |                   | COVID-19 |                                                                    |                                          |                             | Publication                                                            |
|---------|--------|-------------|------------------|-----|-----------------------|--------------------|-----------------------------|-------------------|----------|--------------------------------------------------------------------|------------------------------------------|-----------------------------|------------------------------------------------------------------------|
|         |        |             |                  |     |                       | IgRT               | Antibiotic                  | Immunosuppressant | Severity | Symptoms                                                           | Treatment                                | Outcome                     |                                                                        |
| P12     | F      | 4           | Charge           | sd. | Mild SAHS             | No                 | No                          | No                | Mild     | Asymptomatic                                                       |                                          | Recovered                   | No                                                                     |
| P13     | M      | 13          | Kabuki           | sd. | No                    | No                 | No                          | No                | Mild     | Odynophagia, fever                                                 |                                          | Recovered                   | No                                                                     |
| P14     | M      | 9           | THE              | sd. | No                    | Yes                | No                          | No                | Mild     | Cough, fever, runny nose, diarrhea                                 | No                                       | Recovered                   | No                                                                     |
| P15     | F      | 14          | Sotos            | sd  | No                    | No                 | No                          | No                | Mild     | Headache, asthenia                                                 | No                                       | Recovered                   | No                                                                     |
| P16     | M      | 8           | Bruton           | sd. | No                    | Yes                | No                          | No                | Mild     | Asymptomatic                                                       | No                                       | Recovered                   | Deyà-Martínez <i>et al.</i> , 2021                                     |
| P17     | F      | 17          | CVID             |     | No                    | No                 | No                          | No                | Mild     | Asymptomatic                                                       | No                                       | Recovered                   |                                                                        |
| P18     | M      | 16          | CVID             |     | No                    | No                 | No                          | No                | Mild     | Low-grade fever, odynophagia                                       | No                                       | Recovered                   | No                                                                     |
| P19     | F      | 14          | CVID             |     | No                    | No                 | No                          | No                | Mild     | Asymptomatic                                                       | No                                       | Recovered                   |                                                                        |
| P20     | M      | 18          | ALPS             |     | No                    | No                 | No                          | No                | Mild     | Odynophagia, retroocular pain, runny nose, loss of smell and taste | No                                       | Recovered                   | Deyà-Martínez <i>et al.</i> , 2021                                     |
| P21     | M      | 15          | STAT1 GOF        |     | No                    | No                 | Fluconazole                 | No                | Mild     | Asymptomatic                                                       | No                                       | Guillain-Barré <sup>b</sup> |                                                                        |
| P22     | F      | 7           | STAT1 GOF        |     | No                    | Yes                | Fluconazole, acyclovir      | Ruxolitinib       | Mild     | Asymptomatic                                                       | No                                       | Recovered                   | No                                                                     |
| P23     | M      | 23          | CGD              |     | No                    | No                 | Cotrimoxazole, itraconazole | Corticosteroids   | Mild     | Asymptomatic                                                       | No                                       | Recovered                   |                                                                        |
| P24     | M      | 19          | MyD88 def.       |     | Obesity               | No                 | No                          | No                | Severe   | Fever, cough Hypoxemic pneumonia (no MV)                           | Corticoids Remdesivir Antibiotic Heparin | Recovered                   | Von Bernuth <i>et al.</i> , 2018<br>Deyà-Martínez <i>et al.</i> , 2021 |
| P25     | F      | 17          | MyD88 def.       |     | No                    | No                 | No                          | No                | Moderate | Fever, cough Non-hypoxemic pneumonia                               | Corticoids Remdesivir Antibiotic         | Recovered                   |                                                                        |

<sup>a</sup>The genetic defect is described if known; otherwise, we only provide the immunodeficiency according to the ESID clinical criteria classification (2019)(46) <sup>b</sup>Guillain-Barré after 9 months of testing positive for SARS-CoV-2, with no other infectious trigger detected in the routine screening. ALPS: autoimmune lymphoproliferative syndrome; A-T: ataxia-telangiectasia; CGD: chronic granulomatous disease; def.: deficiency; GOF: gain-of-function; IEI: Inborn errors of immunity; MHCII: major histocompatibility complex II; MMF: mycophenolate mofetil; MV: mechanical ventilation; SAHS: sleep apnea-hypopnea syndrome; sd.: syndrome; THE: trichohepatoenteric; 22q11del: 22q11 deletion.
