# Supplementary material for: Acute and long-term immune responses to SARS-CoV-2 infection in unvaccinated children and young adults with inborn errors of immunity
Source: PubMed Central journal article supplement (PMC9896004; doi:10.3389/fimmu.2023.1084630), 2023-01-20
Supplement: Table_2.pdf [file Table_2.pdf]

**Supplementary table 2.** Comparison of SARS-CoV-2 infection in IEI and non-IEI patients.

|                                       | <b>IEI (n=25)</b> | <b>Non-IEI (n=17)</b> | <b>p-value</b>                              |
|---------------------------------------|-------------------|-----------------------|---------------------------------------------|
| <b>Age (years)<sup>a</sup></b>        | 14.3 (4.5-22.8)   | 15.3 (5.4-20.0)       | 0.5                                         |
| <b>Male</b>                           | 15/25 (60.0%)     | 6/17 (35.3%)          | 0.1                                         |
| <b>COVID-19 pneumonia</b>             | 4/25 (16.0%)      | 1/17 (5.9%)           | 0.3                                         |
| <b>Hypoxemic pneumonia</b>            | 1/25 (4.0%)       | 1/17 (5.9%)           | 0.6                                         |
| <b>Hospitalization</b>                | 4/25 (16.0%)      | 1/17 (5.9%)           | 0.3                                         |
| <b>SARS-CoV-2 specific management</b> | 4/25 (16.0%)      | 1/17 (5.9%)           | 0.3                                         |
| <b>Symptoms<sup>b</sup></b>           | 13/25 (52.0%)     | 13/17 (76.5%)         | 0.1                                         |
| <b>Fever</b>                          | 7/25 (28.0%)      | 5/17 (29.4%)          | 0.6                                         |
| <b>Cough</b>                          | 5/25 (20.0%)      | 1/17 (5.9%)           | 0.2                                         |
| <b>Low-grade fever</b>                | 3/25 (12.0%)      | 0/17 (0%)             | 0.2                                         |
| <b>Odynophagia</b>                    | 3/25 (12.0%)      | 1/17 (5.9%)           | 0.5                                         |
| <b>Runny nose</b>                     | 2/25 (8.0%)       | 4/17 (23.5%)          | 0.2                                         |
| <b>Asthenia</b>                       | 2/25 (8.0%)       | 2/17 (11.8%)          | 0.5                                         |
| <b>Smell and taste loss</b>           | 2/25 (8.0%)       | 0/17 (0%)             | 0.4                                         |
| <b>Headache</b>                       | 1/25 (4.0%)       | 7/17 (41.2%)          | <b>0.004</b><br>(OR 0.06; 95% CI 0.006-0.5) |
| <b>Diarrhea</b>                       | 1/25 (4.0%)       | 1/17 (5.9%)           | 0.6                                         |
| <b>Myalgia</b>                        | 1/25 (4.0%)       | 1/17 (5.9%)           | 0.6                                         |
| <b>Ocular pain</b>                    | 1/25 (4.0%)       | 0/17(0%)              | 0.6                                         |
| <b>Smell and taste loss</b>           | 2/25 (8.0%)       | 0/17(0%)              | 0.3                                         |

<sup>a</sup>Age is expressed as median (min-max). <sup>b</sup>Presence of one or more symptoms
